# Supplementary material
Source: Research Square preprint supplement (doi:10.21203/rs.3.rs-9078185/v1)
Supplement: Supplementary file 1 [file 74de7dfac8bedc0d5dd679e3.xlsx]

## Sheet: Sheet1
Variant_type	sampleID	Peidgree structure	Inheritance	Gene symbol	OMIM Disorder	HGVS g. (GRCh38)	HGVS c.	HGVS p.	Classification
Exonic sequence variant	CDL-525-09P	Singleton	Unknown	ZMYM2	Neurodevelopmental-craniofacial syndrome with variable renal and cardiac abnormalities	NC_000013.11:g.19993634dup	NM_197968.4:c.562dup	p.(Thr188Asnfs*12)	Likely Pathogenic
	CDL-131-01P	Duo	Not maternal	CDC42	Takenouchi-Kosaki syndrome	NC_000001.11:g.22091450A>G	NM_001791.4:c.509A>G	p.(Asp170Gly)	Uncertain Significance - strong
	CDL-242-05P	Trio	de novo	CDC42	Takenouchi-Kosaki syndrome	NC_000001.11:g.22086856C>T	NM_001791.4:c.476C>T	p.(Ala159Val)	Pathogenic
	CDL-387-06P	Trio	Homozygous	WWOX	Developmental and epileptic encephalopathy 28	NC_000016.10:g.78425054C>T	NM_016373.4:c.790C>T	p.(Arg264*)	Pathogenic
	CDL-483-08P (male)	Trio	de novo	NAA10	Ogden syndrome	NC_000023.11:g.153932410G>A	NM_003491.4:c.247C>T	p.(Arg83Cys)	Pathogenic
	CDL-507-08P	Singleton	Unknown	CNOT3	Intellectual developmental disorder with speech delay, autism, and dysmorphic facies	NC_000019.10:g.54143733G>A	NM_014516.4:c.242G>A	p.(Arg81His)	Uncertain Significance
	CDL-532-09P	Singleton	Unknown	SETD5	Intellectual developmental disorder, autosomal dominant 23	NC_000003.12:g.9441696T>G	NM_001080517.3:c.914T>G	p.(Val305Gly)	Uncertain Significance - strong
	CDL-090-99P	singleton	Phase unknown	NBAS	Short stature, optic nerve atrophy, and Pelger-Huet anomaly	NC_000002.12:g.15474300G>A	NM_015909.4:c.1366C>T	p.(Arg456*)	Pathogenic
						NC_000002.12:g.15475814C>T	NM_015909.4:c.1214G>A	p.(Arg405Gln)	Uncertain Significance
	CDL-514-09P (female)	singleton	Unknown	DDX3X	Intellectual developmental disorder, X-linked syndromic, Snijders Blok type	NC_000023.11:g.41346614G>A	NM_001356.5:c.1607G>A	p.(Gly536Glu)	Uncertain Significance
	CDL-053-99P	Duo	Maternal	SMC3	CdLS	NC_000010.11:g.110589714T>C	NM_005445.4:c.1409+6T>C	p.?	Likely Pathogenic
			Not maternal	EBF3	Hypotonia, ataxia, and delayed development syndrome	NC_000010.11:g.129877824A>G	NM_001375380.1:c.580T>C	p.(Cys194Arg)	Uncertain Significance
	CDL-397-06P (male)	Trio	Maternally inherited	TAF1	Intellectual developmental disorder, X-linked syndromic 33	NC_000023.11:g.71366375A>C	NM_004606.5:c.1A>C	p.(Met1?)	Uncertain Significance
Noncoding, cryptic splice	CDL-099-00P	Singleton	Unknown	NIPBL	CdLS	NC_000005.10:g.37043957G>T	NM_133433.4:c.6109-390G>T	p.?	Uncertain Significance
	CDL-111-00P	Trio	de novo	NIPBL	CdLS	NC_000005.10:g.37012200G>A	NM_133433.4:c.4560+1975G>A	p.?	Likely Pathogenic
	CDL-182-04P	Trio	de novo	NIPBL	CdLS	NC_000005.10:g.36958375A>G	NM_133433.4:c.358+144A>G	p.?	Likely Pathogenic
	CDL-306-05P	Singleton	Unknown	RAD21	CdLS	NC_000008.11:g.116852511T>C	NM_006265.3:c.1321+38A>G	p.?	Uncertain Significance - strong
	CDL-378-06P	Trio	de novo	NIPBL	CdLS	NC_000005.10:g.37012200G>A	NM_133433.4:c.4560+1975G>A	p.?	Likely Pathogenic
	CDL-404-07P	Trio	de novo	NIPBL	CdLS	NC_000005.10:g.37049601A>G	NM_133433.4:c.6954+300A>G	p.?	Uncertain Significance
	CDL-552-10P	Duo	Not maternal	NIPBL	CdLS	NC_000005.10:g.36958375A>G	NM_133433.4:c.358+144A>G	p.?	Likely Pathogenic
	CDL-719-15P	Singleton	Unknown	HDAC8	CdLS	NC_000023.11:g.72466350C>T	NM_018486.3:c.738-1619G>A	p.?	Uncertain Significance
Noncoding, promoter	CDL-211-04P	Trio	de novo	NIPBL	CdLS	NC_000005.10:g.36876943del	NM_133433.4:c.-315del	p.?	Uncertain Significance -strong
	CDL-120-01P	Duo	Not maternal	NIPBL	CdLS	NC_000005.10:g.36876791C>T	NM_133433.4:c.-467C>T	p.?	Pathogenic
	CDL-448-07P	Singleton	Unknown	NIPBL	CdLS	NC_000005.10:g.36876791C>T	NM_133433.4:c.-467C>T	p.?	Pathogenic
Noncoding, Splice	CDL-239-05P	Trio	Compound heterozygous	METTL5	Intellectual developmental disorder, autosomal recessive 72	NC_000002.12:g.169811859C>A	NM_014168.4:c.592-1G>T	p.?	Uncertain Significance
						NC_000002.12:g.169819560C>A	NM_014168.4:c.489+1G>T	p.?	Likely Pathogenic
SV, Copy-neutral inversion	CDL-293-05P	Singleton	Unknown	NIPBL	CdLS	NC_000005.10:g.[36967340delinsGACTGT;36967341_39824586inv]			Pathogenic
	CDL-372-06P	Duo	Not maternal	ZEB2	Mowat-Wilson syndrome	NC_000002.12:g.[144497408_144497414delinsAAA;144497415_145067800inv]			Pathogenic
SV, deletion/ duplication	CDL-409-07P	Singleton	Unknown	EP300	Menke-Hennekam syndrome 2	NC_000022.11:g.41177163_41177246del	NM_001429.4:c.5452_5535del	p.(Leu1818_Gln1845del)	Uncertain Significance -strong
	CDL-004-98P	trio	de novo	1q del	Multiple syndromes	NC_000001.11:g.(239622173_239630430)_(248929527_qter)del			Pathogenic
	CDL-148-03P	Singleton	Unknown	3q del	Multiple syndromes	NC_000003.12:g.135716966_160486110del			Pathogenic
	CDL-235-05P (female)	Trio	de novo	PHF6, HPRT1	Borjeson-Forssman-Lehmann syndrome	NC_000023.11:g.134383115_134533836del			Uncertain Significance
	CDL-311-06P	Trio	Inherited from affected mother	RAD21	CdLS	NC_000008.11:g.116857942_116861210del	NM_006265.3:c.374+635_481+414del		Pathogenic
	CDL-315-06P	Trio	Inherited from affected mother	ANKRD11	KBG Syndrome	NC_000016.10:g.89260317_89288363del	NM_013275.6:c.744+167_*8163del		Pathogenic
	CDL-637-13P	Trio	de novo	BCL11A	Dias-Logan syndrome	NC_000002.12:g.60436224_60472120delinsN[?]	NM_022893.4:c.386-3285_*24182delinsN[?]		Pathogenic
	CDL-694-15P	Trio	de novo	HDAC8, PHKA1	CdLS	NC_000023.11:g.72405785_726867348del			Pathogenic
	CDL-401-06P	Duo	Not maternal	SETBP1	Intellectual developmental disorder, autosomal dominant 29	NC_000018.10:g.44912668_44966414dup	NM_015559.3:c.541-37213_4000+13074dup		Pathogenic
				HNRNPD	HNRNP-related neurodevelopmental disorders	NC_000004.12:g.81646032_82588094delinsG			Pathogenic
	CDL-112-00P	Singleton	Unknown	12q dup	12q duplication syndrome	NC_000012.12:g.117690352_125731202dup			Pathogenic
SV, Long insertion	CDL-460-08P	Trio	de novo	HDAC8	CdLS	NC_000023.11:g.72337793_72337801delins[TGA;NC_000004.12:g.165574240_165825983inv]			Uncertain Significance
	CDL-200-04P	Trio	de novo	NIPBL	CdLS	NC_000005.10:g.37036541_37036542insN[?]			Likely Pathogenic
Table 1. Diagnostic or likely diagnostic variants identified from the re-anaysis of whole genome sequencing and RNA sequencing data.
